# Supplementary material for: Network-Assisted Investigation of Combined Causal Signals from Genome-Wide Association Studies in Schizophrenia
Source: PubMed Central journal article supplement (PMC3390381; doi:10.1371/journal.pcbi.1002587), 2012-07-05

### Degree distribution of GAIN-weighted network

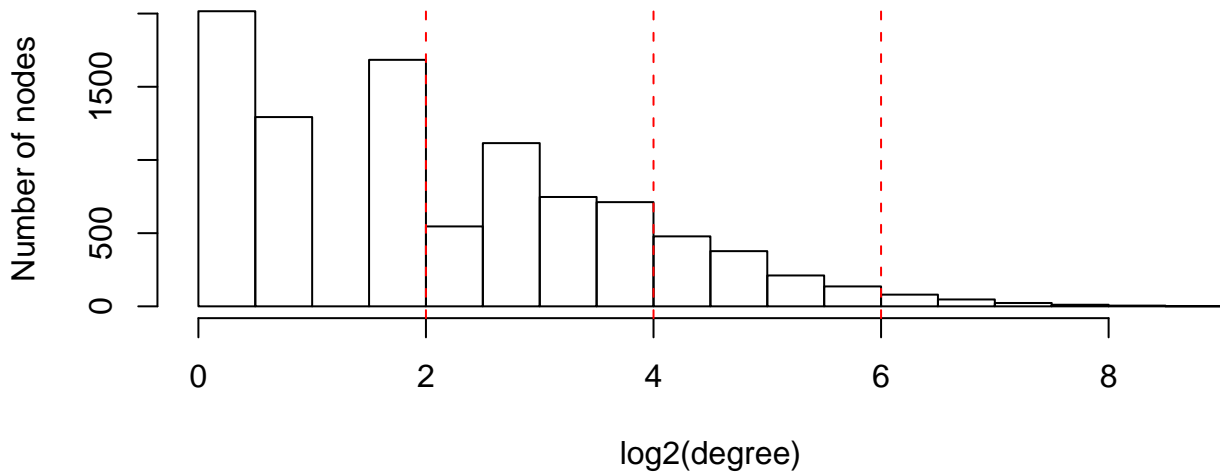

### Degree distribution of ISC-weighted network

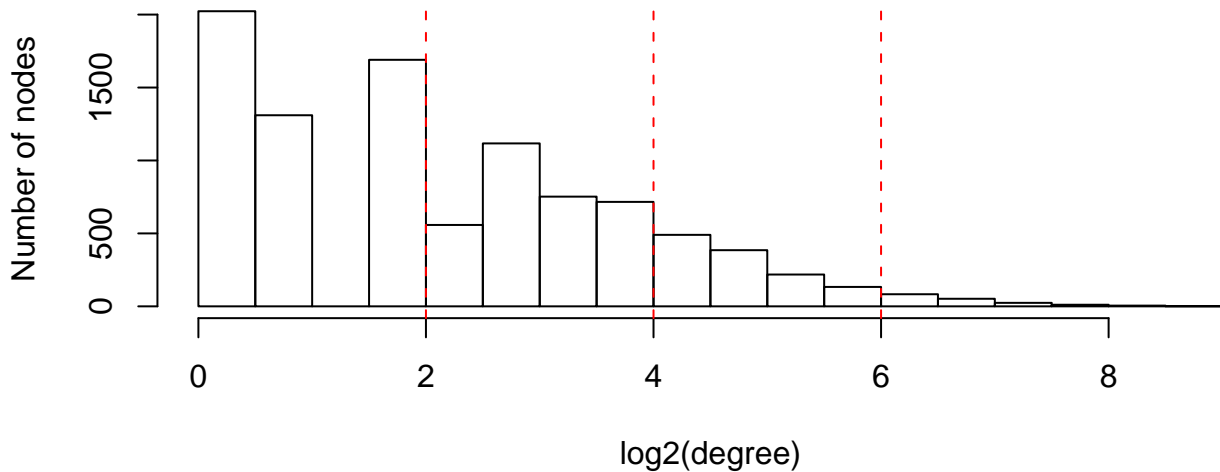

Supplement: pcbi.1002587.s001.pdf [file pcbi.1002587.s001.pdf]
